# Supplementary material
Source: PubMed Central journal article supplement (PMC4357922)
Supplement: AEM.03903-14_zam999116137so1.pdf [file AEM.03903-14_zam999116137so1.pdf]

**Table S1.** Composition of standard and high-fat diets.

| Nutritional profile      | High-Fat Diet | Standard Diet |
|--------------------------|---------------|---------------|
| Protein [%]              | 24.2          | 17.6          |
| Fat [%]                  | 34.7          | 5.2           |
| Fiber (max) [%]          | 5.5           | 3.9           |
| Carbohydrates [%]        | 27.8          | 68.3          |
| Energy (kcal/g)          | Kcal / %      | Kcal / %      |
| From Protein             | 0.969 / 18.6  | 0.705 / 18.3  |
| From Fat (ether extract) | 3.122 / 59.9  | 0.464 / 12.1  |
| From Carbohydrates       | 1.113 / 21.4  | 2.733 / 71.0  |

**Table S2.** Body weight, relative epididymal fat pad weight, consumed drinking water, consumed IVS-1 and GOS, and host physiological markers.

|                                                                      | Standard Diet          | High-Fat Diet          | High-Fat Diet Prebiotic | High-Fat Diet Probiotic | High-Fat Diet Synbiotic | <i>p</i> - value ANOVA |
|----------------------------------------------------------------------|------------------------|------------------------|-------------------------|-------------------------|-------------------------|------------------------|
| Average body weight [g rat <sup>-1</sup> ]                           | 475 ±19                | 449 ±46                | 499 ±81                 | 496 ±62                 | 502 ±51                 | 0.5446                 |
| Average relative epididymal fat pad weight [% rat <sup>-1</sup> ]    | 0.84 ±0.2              | 1.04 ±0.4              | 1.12 ±0.3               | 1.01 ±0.2               | 1.08 ±0.5               | 0.8267                 |
| Average water consumption [ml rat <sup>-1</sup> day <sup>-1</sup> ]  | 29.3 ±4.1 <sup>b</sup> | 35.6 ±4.5 <sup>a</sup> | 36.3 ±4.9 <sup>a</sup>  | 41.9 ±8.6 <sup>c</sup>  | 35.4 ±4.5 <sup>a</sup>  | <0.0001                |
| Average IVS-1 consumption [CFU rat <sup>-1</sup> day <sup>-1</sup> ] | NA                     | NA                     | NA                      | 1.26 x 10 <sup>9a</sup> | 1.06 x 10 <sup>9b</sup> | 0.0001 <sup>#</sup>    |
| Average GOS consumption [g rat <sup>-1</sup> day <sup>-1</sup> ]     | NA                     | NA                     | 1.20                    | NA                      | 1.17                    | 0.2063 <sup>#</sup>    |
| Triglyceride content [µg TG mg <sup>-1</sup> tissue]                 | 17.8 ±4.3 <sup>a</sup> | 70.7 ±1.4 <sup>b</sup> | 62.7 ±1.2 <sup>bc</sup> | 53.5 ±0.8 <sup>c</sup>  | 92.4 ±2.4 <sup>d</sup>  | <0.0001                |
| Alkanine Phosphatase (ALP) [units liter <sup>-1</sup> ]              | 227 ±83                | 399 ±55                | 464 ±127                | 458 ±167                | 460 ±120                | 0.0646                 |
| Alanine Transferase (ALT) [units liter <sup>-1</sup> ]               | 34 ±13                 | 42 ±11                 | 36 ±5                   | 37±7                    | 41 ±4                   | 0.6418                 |
| TNF-α [pg ml <sup>-1</sup> ]                                         | 14.2 ±2.3              | 14.1 ±2.6              | 16.2 ±3.2               | 16.7 ±7.9               | 13.8 ±1.4               | 0.4718                 |
| MCP-1 [pg ml <sup>-1</sup> ]                                         | 224 ±25                | 228 ±37                | 239 ±21                 | 248 ±63                 | 243 ±36                 | 0.6345                 |

\* as a threshold for steatosis was a liver triglyceride levels greater than 50 µg/mg of tissue

NA: not applicable

<sup>#</sup> Student's *t*-test was applied

Values with different letters are significantly different from each other

Figure S1

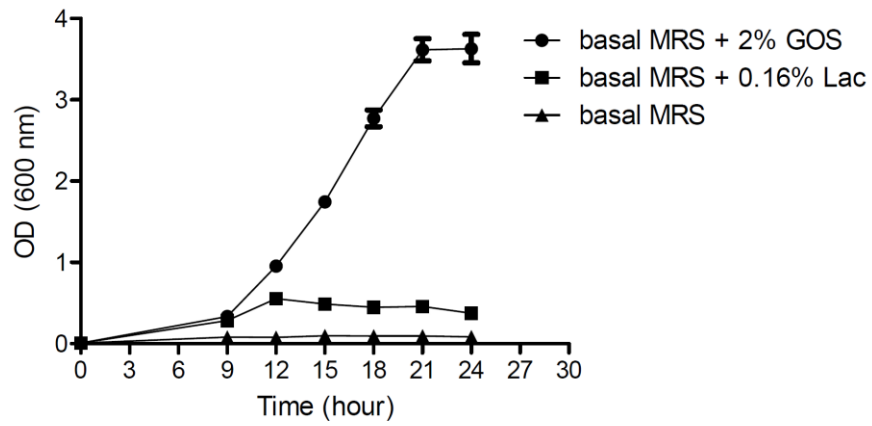

**Figure S1.** Growth of *B. adolescentis* IVS-1 in basal MRS supplemented with GOS, 0.16% lactose (residual sugar present in the commercial GOS), or basal MRS without carbohydrates.
